# Supplementary material for: Model predictive path integral for decentralized multi-agent collision avoidance
Source: PeerJ journal article supplement (doi:10.7717/peerj-cs.2220), 2024-08-21
Supplement: Appendix.pdf [file Appendix.pdf]

## APPENDIX

### A PSEUDOCODE FOR MODEL PREDICTIVE PATH INTEGRAL FOR MULTI-AGENT COLLISION AVOIDANCE

---

**Algorithm 1** MPPI FOR MULTI-AGENT COLLISION AVOIDANCE

---

**Input:**

$K$  – number of sampled trajectories;  $T$  – planning time horizon;  $i$  – current agent;  $\mathbf{x}_0$  – current agent state;

$\mathcal{N}_i$  – neighboring agents;  $X_{\mathcal{N}_i} = \{(p_x^j, p_y^j, v_x^j, v_y^j, r^j) \mid j \in \mathcal{N}_i\}$  – information on neighboring agents;

$r(\cdot)$ ,  $\phi(\cdot)$ ,  $c'(\cdot)$  – running, terminal and control cost functions;  $F(\cdot)$ ,  $G(\cdot)$  – transition functions;

$\mathbf{u}_{\min}$ ,  $\mathbf{u}_{\max}$  – control limits;  $\alpha$  – desired safety probability;  $\lambda$  – MPPI hyperparameter;

$\mathbf{u}^{\text{init}}$  – default initial control action;  $U^{\text{init}} = \{\mathbf{u}_0^{\text{init}}, \dots, \mathbf{u}_{T-1}^{\text{init}}\}$  – Initial control sequence (obtained from previous step)

1: Predict neighbors trajectories  $\pi_1, \pi_2, \dots, \pi_N$

2: Compute linear constraints  $ORCA^\tau = \{ORCA_{ij}^\tau \mid j \in \mathcal{N}_i\}$  based on  $X_{\mathcal{N}_i}$

3: Find  $\mu'$ ,  $\Sigma'$  based on  $\mathbf{u}_0^{\text{init}}$ ,  $\Sigma$ ,  $\alpha$  and  $ORCA^\tau$

4: **for**  $k = 1$  to  $K$  **do**

5:     Sample  $\epsilon_0^k \sim \mathcal{N}(\mu', \Sigma')$

6:     Sample  $\{\epsilon_1^k, \dots, \epsilon_T^k\}, \epsilon_t^k \sim \mathcal{N}(0, \Sigma)$

7:     **for**  $t = 1$  to  $T$  **do**

8:          $\mathbf{u}_{t-1}^k \leftarrow \mathbf{u}_{t-1}^{\text{init}} + \epsilon_{t-1}^k$

9:         Limit  $\mathbf{u}_{t-1}^k$  using bounds  $\mathbf{u}_{\min}$  and  $\mathbf{u}_{\max}$

10:          $\mathbf{x}_t \leftarrow F(\mathbf{x}_{t-1}) + G(\mathbf{x}_{t-1})\mathbf{u}_{t-1}$

11:          $S(\tilde{U}^k) \leftarrow S(\tilde{U}^k) + r(\mathbf{x}_t) + c'(\mathbf{u}_t)$

12:     **end for**

13: **end for**

14:  $S(\tilde{U}^k) \leftarrow S(\tilde{U}^k) + \phi(\mathbf{x}_T)$

15:  $\rho \leftarrow \min_k S(U_k)$

16:  $\eta \leftarrow \sum_{k=1}^K (\exp(-\frac{1}{\lambda} (\tilde{S}(U^k) - \rho)))$

17: **for**  $k = 1$  to  $K$  **do**

18:      $\omega(U^k) \leftarrow \exp(-\frac{1}{\lambda} (\tilde{S}(U^k) - \rho))$

19: **end for**

20: **for**  $t = 0$  to  $T - 1$  **do**

21:      $\mathbf{u}_t^* = \sum_{k=1}^K (\omega(U^k) \mathbf{u}_t^k)$

22: **end for**

23:  $\mathbf{u}_{\text{result}} \leftarrow \mathbf{u}_0^*$

24: **for**  $t = 1$  to  $T - 1$  **do**

25:      $\mathbf{u}_{t-1}^{\text{init}} \leftarrow \mathbf{u}_t^*$

26: **end for**

27:  $\mathbf{u}_{T-1}^{\text{init}} \leftarrow \mathbf{u}^{\text{init}}$

28: **return**  $\mathbf{u}_{\text{result}}$  and new control sequence  $U^{\text{init}}$  for next step

---

## B OPTIMIZATION PROBLEM FORMULATION FOR SINGLE-INTEGRATOR DYNAMICS

In case of single-integrator dynamics case, the control vector is defined as velocity of agent  $\mathbf{u}_t = (v_{x,t}, v_{y,t})$  and state defined as position  $\mathbf{x}_t = (p_{x,t}, p_{y,t})$ . So, the transition functions and equation of movement are the following:

$$F(\mathbf{x}_t) = \mathbf{x}_t; G(\mathbf{x}_t) = \begin{pmatrix} 1 & 0 \\ 0 & 1 \end{pmatrix} \quad (36)$$

$$\begin{pmatrix} p_{x,t+1} \\ p_{y,t+1} \end{pmatrix} = \begin{pmatrix} p_{x,t} \\ p_{y,t} \end{pmatrix} + \begin{pmatrix} 1 & 0 \\ 0 & 1 \end{pmatrix} \begin{pmatrix} v_{x,t} \\ v_{y,t} \end{pmatrix} \quad (37)$$

Let  $\mu_{v_x}, \mu_{v_y}, \sigma_{v_x}, \sigma_{v_y}$  be initial distribution parameters and  $\mu'_{v_x}, \mu'_{v_y}, \sigma'_{v_x}, \sigma'_{v_y}$  be new parameters. We also involve an auxiliary variable  $t_{\mu'_{v_x}}, t_{\mu'_{v_y}}, t_{\sigma'_{v_x}}, t_{\sigma'_{v_y}}$  to replace the module in objective function with linear expression. Thus, elements of SOCP linear objective function can be defined in next form:

$$\begin{aligned} \mathbf{f} &= (0, 0, 0, 0, 1, 1, 1, 1), \\ \mathbf{x} &= (\mu'_{v_x}, \mu'_{v_y}, \sigma'_{v_x}, \sigma'_{v_y}, t_{\mu'_{v_x}}, t_{\mu'_{v_y}}, t_{\sigma'_{v_x}}, t_{\sigma'_{v_y}}) \end{aligned} \quad (38)$$

Then, the objective function and linear constraints are the following:

$$\begin{aligned} \text{minimize} \quad & t_{\mu'_{v_x}} + t_{\mu'_{v_y}} + t_{\sigma'_{v_x}} + t_{\sigma'_{v_y}} \\ \text{s.t.} \quad & -t_{\mu'_{v_x}} \leq \mu'_{v_x} - \mu_{v_x} \leq t_{\mu'_{v_x}} \\ & -t_{\mu'_{v_y}} \leq \mu'_{v_y} - \mu_{v_y} \leq t_{\mu'_{v_y}} \\ & -t_{\sigma'_{v_x}} \leq \sigma'_{v_x} - \sigma_{v_x} \leq t_{\sigma'_{v_x}} \\ & -t_{\sigma'_{v_y}} \leq \sigma'_{v_y} - \sigma_{v_y} \leq t_{\sigma'_{v_y}} \\ & \mu'_{v_x} + \Phi^{-1}(\alpha)\sigma'_{v_x} \leq v_{x,max}, \\ & \mu'_{v_x} - \Phi^{-1}(\alpha)\sigma'_{v_x} \geq v_{x,min}, \\ & \mu'_{v_y} + \Phi^{-1}(\alpha)\sigma'_{v_y} \leq v_{y,max}, \\ & \mu'_{v_y} - \Phi^{-1}(\alpha)\sigma'_{v_y} \geq v_{y,min}, \\ & \sigma'_{v_x} \geq 0, \sigma'_{v_y} \geq 0, \end{aligned} \quad (39)$$

Let  $a_j, b_j, c_j$  be coefficients of ORCA linear constraint for some neighbor  $j$ . Then, inequality from Eq. 30 parameters can be written in next form:

$$A'_j = \begin{pmatrix} 0 & 0 & a_j & 0 & 0 & 0 & 0 & 0 \\ 0 & 0 & 0 & b_j & 0 & 0 & 0 & 0 \end{pmatrix}, \quad (40)$$

$$b'_j = -c_j \quad (41)$$

$$\mathbf{c}'_j = -\frac{1}{\Phi^{-1}(\alpha)} \cdot (a_j, b_j, 0, 0, 0, 0, 0, 0) \quad (42)$$

## C OPTIMIZATION PROBLEM FORMULATION FOR DIFFERENTIAL-DRIVE ROBOT DYNAMICS

In case of differential-drive robot dynamics, described in Eq. 3, the optimization problem can be represented as linear program (LP).

First, let's repeat the steps described in section "Finding Safe Distribution Parameters" and shown in appendix B on an example of single-integrator dynamics. Let  $\mu_v, \mu_w, \sigma_v, \sigma_w$  be initial distribution parameters and  $\mu'_v, \mu'_w, \sigma'_v, \sigma'_w$  be new parameters. We also involve an auxiliary variable  $t_{\mu'_v}, t_{\mu'_w}, t_{\sigma'_v}, t_{\sigma'_w}$  to replace module in objective function with linear expression. Thus, elements of SOCP linear objective function can be defined in next form:

$$\begin{aligned} \mathbf{f} &= (0, 0, 0, 0, 1, 1, 1, 1), \\ \mathbf{x} &= (\mu'_v, \mu'_w, \sigma'_v, \sigma'_w, t_{\mu'_v}, t_{\mu'_w}, t_{\sigma'_v}, t_{\sigma'_w}) \end{aligned} \quad (43)$$

Then, the objective function and linear constraints are the following:

$$\begin{aligned} \text{minimize} \quad & t_{\mu'_v} + t_{\mu'_w} + t_{\sigma'_v} + t_{\sigma'_w} \\ \text{s.t.} \quad & -t_{\mu'_v} \leq \mu'_v - \mu_v \leq t_{\mu'_v} \\ & -t_{\mu'_w} \leq \mu'_w - \mu_w \leq t_{\mu'_w} \\ & -t_{\sigma'_v} \leq \sigma'_v - \sigma_v \leq t_{\sigma'_v} \\ & -t_{\sigma'_w} \leq \sigma'_w - \sigma_w \leq t_{\sigma'_w} \\ & \mu'_v + \Phi^{-1}(\alpha)\sigma'_v \leq v_{max}, \\ & \mu'_v - \Phi^{-1}(\alpha)\sigma'_v \geq v_{min}, \\ & \mu'_w + \Phi^{-1}(\alpha)\sigma'_w \leq w_{max}, \\ & \mu'_w - \Phi^{-1}(\alpha)\sigma'_w \geq w_{min}, \\ & \sigma'_v \geq 0, \sigma'_w \geq 0, \end{aligned} \quad (44)$$

Next, we will find inequality (Eq. 30) parameters based on ORCA linear constraint coefficients  $a_j, b_j, c_j$  for some neighbor  $j$ . Then, inequality from Eq. 30 parameters can be written in next form:

$$A'_j = \begin{pmatrix} 0 & 0 & [a_j \cos \theta_t + b_j \sin \theta_t] & 0 & 0 & 0 & 0 & 0 \\ 0 & 0 & 0 & 0 & 0 & 0 & 0 & 0 \end{pmatrix}, \quad (45)$$

$$b'_j = -c_j \quad (46)$$

$$\mathbf{c}'_j = -\frac{1}{\Phi^{-1}(\alpha)} \cdot ([a_j \cos \theta_t + b_j \sin \theta_t], 0, 0, 0, 0, 0, 0, 0) \quad (47)$$

It is easy to see, that final inequality can be represented as linear and not include any variable associated with  $w$ .

$$[a_j \cos \theta_t + b_j \sin \theta_t] \sigma_v \leq \frac{[a_j \cos \theta_t + b_j \sin \theta_t]}{\Phi^{-1}(\alpha)} \cdot \mu_v - \frac{c_j}{\Phi^{-1}(\alpha)}, \quad (48)$$

So, we can exclude every variable associated with  $w$  from the problem 44, since these variables do not affect the consideration of collision avoidance constraints. Now, the final LP is obtained:

$$\begin{aligned} \text{minimize} \quad & t_{\mu'_v} + t_{\sigma'_v} \\ \text{s.t.} \quad & -t_{\mu'_v} \leq \mu'_v - \mu_v \leq t_{\mu'_v} \\ & -t_{\sigma'_v} \leq \sigma'_v - \sigma_v \leq t_{\sigma'_v} \\ & \mu'_v + \Phi^{-1}(\alpha)\sigma'_v \leq v_{max}, \\ & \mu'_v - \Phi^{-1}(\alpha)\sigma'_v \geq v_{min}, \\ & \sigma'_v \geq 0, \\ & [a_j \cos \theta_t + b_j \sin \theta_t] \sigma_v \leq \frac{[a_j \cos \theta_t + b_j \sin \theta_t]}{\Phi^{-1}(\alpha)} \cdot \mu_v - \frac{c_j}{\Phi^{-1}(\alpha)}, \forall j \in \mathcal{N}_i \end{aligned} \quad (49)$$
